# Supplementary material for: Light-harvesting and electronic contacting capabilities of Ru(ii) Ipa rod and star complexes–first principles predictions
Source: Royal Society of Chemistry journal article supplement (doi:10.1039/c2ra21240d), 2012-01-01
Supplement: c2ra21240d.pdf [file c2ra21240d.pdf]

## SUPPORTING INFORMATION

# LIGHT-HARVESTING AND ELECTRONIC CONTACTING CAPABILITIES OF RU(II) IPA ROD AND STAR COMPLEXES - FIRST PRINCIPLES PREDICTIONS

Petter Persson<sup>1,\*</sup>, Marta Knitter<sup>1</sup>, Elena Galoppini<sup>2</sup>

<sup>1</sup>Theoretical Chemistry Division, Chemistry Department, Lund University, Box 124, S-22100 Lund, Sweden

<sup>2</sup>Department of Chemistry, Rutgers University, 73 Warren Street, Newark, New Jersey, 07102, USA

\*Correspondence to: [Petter.Persson@teokem.lu.se](mailto:Petter.Persson@teokem.lu.se)

### Calculated TD-DFT excitations

All calculations performed using Gaussian09 (Revision A.02).  
Singlet excitations from TD-DFT calculations with pbe1pbe/sdd  
and scrf=(iefpcm,solvent=acetonitrile).

| State     | E/eV   | $\lambda$ /nm | f      |
|-----------|--------|---------------|--------|
| -----     |        |               |        |
| <b>L1</b> |        |               |        |
| 1         | 3.8938 | 318.41        | 0.0042 |
| 2         | 4.0272 | 307.87        | 0.0000 |
| 3         | 4.2350 | 292.76        | 0.3260 |
| 4         | 4.2492 | 291.78        | 0.0265 |
| 5         | 4.4890 | 276.19        | 0.0000 |
| 6         | 4.5713 | 271.22        | 0.0008 |
| 7         | 4.6163 | 268.58        | 0.0000 |
| 8         | 4.6658 | 265.73        | 0.0010 |
| 9         | 4.9939 | 248.27        | 0.0000 |
| 10        | 5.3261 | 232.79        | 0.0000 |
| <b>L2</b> |        |               |        |
| 1         | 4.0173 | 308.63        | 0.0279 |
| 2         | 4.0414 | 306.78        | 0.0030 |
| 3         | 4.1360 | 299.77        | 1.0644 |
| 4         | 4.2163 | 294.06        | 0.1593 |
| 5         | 4.3899 | 282.43        | 0.0000 |
| 6         | 4.4934 | 275.93        | 0.0002 |
| 7         | 4.6088 | 269.02        | 0.0008 |
| 8         | 4.6856 | 264.60        | 0.0002 |
| 9         | 4.6977 | 263.92        | 0.3051 |
| 10        | 4.7213 | 262.61        | 0.0000 |

**L3**

|    |        |        |        |
|----|--------|--------|--------|
| 1  | 3.4781 | 356.47 | 2.1783 |
| 2  | 3.6339 | 341.18 | 0.0211 |
| 3  | 4.0382 | 307.03 | 0.0028 |
| 4  | 4.0828 | 303.67 | 0.0236 |
| 5  | 4.2075 | 294.68 | 0.0344 |
| 6  | 4.3888 | 282.50 | 0.0001 |
| 7  | 4.4151 | 280.82 | 0.2194 |
| 8  | 4.5367 | 273.29 | 0.0086 |
| 9  | 4.5734 | 271.10 | 0.0008 |
| 10 | 4.5952 | 269.81 | 0.0553 |

**L4**

|    |        |        |        |
|----|--------|--------|--------|
| 1  | 3.3492 | 370.19 | 1.5602 |
| 2  | 3.5840 | 345.94 | 0.0166 |
| 3  | 3.9131 | 316.85 | 0.4983 |
| 4  | 4.0006 | 309.92 | 0.0096 |
| 5  | 4.0334 | 307.39 | 0.0028 |
| 6  | 4.1534 | 298.51 | 0.0402 |
| 7  | 4.2396 | 292.44 | 0.0080 |
| 8  | 4.3315 | 286.24 | 0.1919 |
| 9  | 4.3842 | 282.80 | 0.0001 |
| 10 | 4.4600 | 277.99 | 0.0076 |

**L5**

|    |        |        |        |
|----|--------|--------|--------|
| 1  | 4.0257 | 307.98 | 0.0000 |
| 2  | 4.0260 | 307.96 | 0.0558 |
| 3  | 4.0295 | 307.69 | 0.0037 |
| 4  | 4.0723 | 304.46 | 2.3786 |
| 5  | 4.1436 | 299.22 | 0.0000 |
| 6  | 4.2128 | 294.30 | 0.0000 |
| 7  | 4.2168 | 294.02 | 0.0000 |
| 8  | 4.2650 | 290.70 | 0.1258 |
| 9  | 4.3670 | 283.91 | 0.1321 |
| 10 | 4.4806 | 276.71 | 0.0000 |

**L6**

|    |        |        |        |
|----|--------|--------|--------|
| 1  | 3.4196 | 362.57 | 4.5184 |
| 2  | 3.5183 | 352.39 | 0.0000 |
| 3  | 3.6378 | 340.82 | 0.0002 |
| 4  | 3.6378 | 340.82 | 0.0419 |
| 5  | 3.7427 | 331.27 | 0.0000 |
| 6  | 3.7502 | 330.60 | 0.0050 |
| 7  | 4.0856 | 303.47 | 0.0000 |
| 8  | 4.0856 | 303.47 | 0.0001 |
| 9  | 4.1140 | 301.37 | 0.0000 |
| 10 | 4.1214 | 300.83 | 0.0257 |

**L7**

|   |        |        |        |
|---|--------|--------|--------|
| 1 | 3.2573 | 380.64 | 2.3407 |
| 2 | 3.4273 | 361.76 | 1.1450 |

|    |        |        |        |
|----|--------|--------|--------|
| 3  | 3.5089 | 353.35 | 0.0247 |
| 4  | 3.5228 | 351.95 | 0.0117 |
| 5  | 3.6352 | 341.07 | 0.0192 |
| 6  | 3.7592 | 329.81 | 0.0134 |
| 7  | 3.8755 | 319.92 | 0.6197 |
| 8  | 3.8770 | 319.80 | 0.0009 |
| 9  | 3.9209 | 316.21 | 0.0083 |
| 10 | 4.0743 | 304.31 | 0.0002 |

**L8**

|    |        |        |        |
|----|--------|--------|--------|
| 1  | 3.8261 | 324.05 | 2.9356 |
| 2  | 3.9391 | 314.75 | 0.0000 |
| 3  | 3.9867 | 311.00 | 0.0036 |
| 4  | 4.0283 | 307.79 | 0.0000 |
| 5  | 4.0936 | 302.87 | 0.0016 |
| 6  | 4.1377 | 299.65 | 0.0000 |
| 7  | 4.1938 | 295.64 | 0.1441 |
| 8  | 4.2687 | 290.45 | 0.0000 |
| 9  | 4.4994 | 275.56 | 0.0000 |
| 10 | 4.5217 | 274.20 | 0.0000 |

**L9**

|    |        |        |        |
|----|--------|--------|--------|
| 1  | 3.2213 | 384.89 | 3.3217 |
| 2  | 3.3185 | 373.62 | 0.0000 |
| 3  | 3.5068 | 353.55 | 0.0000 |
| 4  | 3.5212 | 352.11 | 0.0284 |
| 5  | 3.7628 | 329.50 | 0.0000 |
| 6  | 3.7634 | 329.45 | 0.0557 |
| 7  | 3.8071 | 325.67 | 0.0023 |
| 8  | 3.8614 | 321.09 | 0.0000 |
| 9  | 4.2224 | 293.64 | 0.0000 |
| 10 | 4.2423 | 292.26 | 0.0002 |

**RuN3-L1**

|    |        |        |        |
|----|--------|--------|--------|
| 1  | 1.6419 | 755.13 | 0.0264 |
| 2  | 1.8999 | 652.59 | 0.0005 |
| 3  | 2.1213 | 584.47 | 0.0650 |
| 4  | 2.2173 | 559.17 | 0.0243 |
| 5  | 2.4427 | 507.57 | 0.1736 |
| 6  | 2.5200 | 492.00 | 0.0100 |
| 7  | 2.5909 | 478.54 | 0.0344 |
| 8  | 2.6542 | 467.13 | 0.0812 |
| 9  | 2.6943 | 460.18 | 0.0371 |
| 10 | 2.7818 | 445.70 | 0.0277 |
| 11 | 2.8066 | 441.77 | 0.0368 |
| 12 | 3.0581 | 405.43 | 0.0050 |
| 13 | 3.1094 | 398.74 | 0.0009 |
| 14 | 3.2439 | 382.21 | 0.0076 |
| 15 | 3.2752 | 378.56 | 0.0368 |
| 16 | 3.3007 | 375.63 | 0.0082 |
| 17 | 3.3099 | 374.59 | 0.0043 |

|    |        |        |        |
|----|--------|--------|--------|
| 18 | 3.3972 | 364.96 | 0.0416 |
| 19 | 3.4440 | 360.00 | 0.0603 |
| 20 | 3.5018 | 354.05 | 0.0589 |
| 21 | 3.6041 | 344.01 | 0.0043 |
| 22 | 3.6405 | 340.57 | 0.0076 |
| 23 | 3.7009 | 335.01 | 0.0124 |
| 24 | 3.7318 | 332.24 | 0.0095 |
| 25 | 3.7904 | 327.10 | 0.0574 |
| 26 | 3.8192 | 324.63 | 0.0052 |
| 27 | 3.8437 | 322.56 | 0.0301 |
| 28 | 3.8799 | 319.55 | 0.0088 |
| 29 | 3.9186 | 316.40 | 0.0266 |
| 30 | 3.9764 | 311.80 | 0.0327 |
| 31 | 4.0173 | 308.62 | 0.0064 |
| 32 | 4.1033 | 302.16 | 0.0727 |
| 33 | 4.1076 | 301.84 | 0.0311 |
| 34 | 4.1514 | 298.66 | 0.1607 |
| 35 | 4.2644 | 290.74 | 0.0022 |
| 36 | 4.2671 | 290.56 | 0.0025 |
| 37 | 4.3233 | 286.78 | 0.0866 |
| 38 | 4.3356 | 285.97 | 0.0032 |
| 39 | 4.3489 | 285.09 | 0.0007 |
| 40 | 4.3604 | 284.34 | 0.0106 |

**RuN3-L2**

|    |        |        |        |
|----|--------|--------|--------|
| 1  | 1.8998 | 652.60 | 0.0936 |
| 2  | 2.1000 | 590.41 | 0.0198 |
| 3  | 2.1582 | 574.48 | 0.0040 |
| 4  | 2.3103 | 536.66 | 0.1920 |
| 5  | 2.3947 | 517.74 | 0.0045 |
| 6  | 2.5606 | 484.20 | 0.0648 |
| 7  | 2.6562 | 466.78 | 0.1750 |
| 8  | 2.7423 | 452.12 | 0.0010 |
| 9  | 2.9298 | 423.19 | 0.0130 |
| 10 | 2.9667 | 417.93 | 0.0057 |
| 11 | 3.0674 | 404.20 | 0.0001 |
| 12 | 3.1007 | 399.86 | 0.0126 |
| 13 | 3.1166 | 397.82 | 0.0000 |
| 14 | 3.1265 | 396.56 | 0.0571 |
| 15 | 3.2331 | 383.49 | 0.0023 |
| 16 | 3.3454 | 370.61 | 0.0300 |
| 17 | 3.3810 | 366.71 | 0.0203 |
| 18 | 3.3832 | 366.47 | 0.0265 |
| 19 | 3.4284 | 361.64 | 0.0295 |
| 20 | 3.4453 | 359.86 | 0.0152 |
| 21 | 3.5166 | 352.57 | 0.0775 |
| 22 | 3.5371 | 350.53 | 0.0454 |
| 23 | 3.5557 | 348.69 | 0.0009 |
| 24 | 3.5906 | 345.30 | 0.0036 |
| 25 | 3.6253 | 342.00 | 0.0422 |
| 26 | 3.6581 | 338.93 | 0.0337 |

|    |        |        |        |
|----|--------|--------|--------|
| 27 | 3.6846 | 336.50 | 0.0580 |
| 28 | 3.7129 | 333.93 | 0.1622 |
| 29 | 3.7467 | 330.91 | 0.0012 |
| 30 | 3.7540 | 330.27 | 0.0113 |
| 31 | 3.7646 | 329.35 | 0.0025 |
| 32 | 3.7948 | 326.72 | 0.0660 |
| 33 | 3.8280 | 323.88 | 0.0055 |
| 34 | 3.9810 | 311.44 | 0.0480 |
| 35 | 4.0921 | 302.98 | 0.0787 |
| 36 | 4.0946 | 302.80 | 0.0167 |
| 37 | 4.1042 | 302.09 | 0.5633 |
| 38 | 4.1899 | 295.91 | 0.0045 |
| 39 | 4.2117 | 294.38 | 0.1134 |
| 40 | 4.2280 | 293.24 | 0.0041 |

### **RuN3-L3**

|    |        |        |        |
|----|--------|--------|--------|
| 1  | 1.9018 | 651.92 | 0.1421 |
| 2  | 2.0912 | 592.90 | 0.0219 |
| 3  | 2.1678 | 571.93 | 0.0035 |
| 4  | 2.3049 | 537.91 | 0.2797 |
| 5  | 2.3858 | 519.67 | 0.0057 |
| 6  | 2.5454 | 487.10 | 0.1066 |
| 7  | 2.6094 | 475.15 | 0.2187 |
| 8  | 2.8892 | 429.12 | 0.0003 |
| 9  | 2.8983 | 427.78 | 0.0126 |
| 10 | 2.9300 | 423.15 | 0.0102 |
| 11 | 3.0587 | 405.34 | 0.0100 |
| 12 | 3.1194 | 397.46 | 0.1432 |
| 13 | 3.2164 | 385.48 | 0.1357 |
| 14 | 3.2166 | 385.45 | 0.0070 |
| 15 | 3.2244 | 384.51 | 0.0006 |
| 16 | 3.2529 | 381.15 | 0.0001 |
| 17 | 3.3338 | 371.90 | 0.2540 |
| 18 | 3.3538 | 369.68 | 1.0498 |
| 19 | 3.3779 | 367.05 | 0.0113 |
| 20 | 3.3965 | 365.03 | 0.0216 |
| 21 | 3.4086 | 363.74 | 0.1267 |
| 22 | 3.4898 | 355.28 | 0.0263 |
| 23 | 3.5155 | 352.67 | 0.0022 |
| 24 | 3.5340 | 350.83 | 0.0185 |
| 25 | 3.5438 | 349.86 | 0.0220 |
| 26 | 3.5691 | 347.38 | 0.0047 |
| 27 | 3.6079 | 343.65 | 0.0081 |
| 28 | 3.6363 | 340.96 | 0.0423 |
| 29 | 3.6623 | 338.54 | 0.0386 |
| 30 | 3.7004 | 335.06 | 0.0239 |
| 31 | 3.7019 | 334.92 | 0.0205 |
| 32 | 3.7572 | 329.99 | 0.0540 |
| 33 | 3.7974 | 326.50 | 0.0491 |
| 34 | 3.8172 | 324.80 | 0.0104 |
| 35 | 3.8481 | 322.20 | 0.0053 |

|    |        |        |        |
|----|--------|--------|--------|
| 36 | 3.8936 | 318.43 | 0.0940 |
| 37 | 3.9026 | 317.70 | 0.0006 |
| 38 | 3.9092 | 317.16 | 0.1545 |
| 39 | 4.0873 | 303.34 | 0.0016 |
| 40 | 4.1151 | 301.29 | 0.0173 |

#### **RuN3-L4**

|    |        |        |        |
|----|--------|--------|--------|
| 1  | 1.8639 | 665.17 | 0.0079 |
| 2  | 2.0993 | 590.61 | 0.0291 |
| 3  | 2.1627 | 573.28 | 0.0149 |
| 4  | 2.3125 | 536.15 | 0.3916 |
| 5  | 2.3720 | 522.70 | 0.0008 |
| 6  | 2.5371 | 488.68 | 0.1008 |
| 7  | 2.6583 | 466.40 | 0.0731 |
| 8  | 2.8290 | 438.25 | 0.2458 |
| 9  | 2.9028 | 427.12 | 0.0118 |
| 10 | 2.9113 | 425.88 | 0.0000 |
| 11 | 3.0549 | 405.85 | 0.0246 |
| 12 | 3.1085 | 398.86 | 0.0267 |
| 13 | 3.1553 | 392.93 | 0.0009 |
| 14 | 3.1704 | 391.07 | 0.0310 |
| 15 | 3.1843 | 389.36 | 1.0168 |
| 16 | 3.2344 | 383.34 | 0.0000 |
| 17 | 3.2912 | 376.71 | 0.0272 |
| 18 | 3.3129 | 374.25 | 0.0075 |
| 19 | 3.3671 | 368.23 | 0.0097 |
| 20 | 3.3739 | 367.48 | 0.0169 |
| 21 | 3.4097 | 363.63 | 0.0603 |
| 22 | 3.4323 | 361.23 | 0.0122 |
| 23 | 3.4843 | 355.83 | 0.0033 |
| 24 | 3.5462 | 349.63 | 0.0024 |
| 25 | 3.5562 | 348.64 | 0.0078 |
| 26 | 3.5779 | 346.53 | 0.0151 |
| 27 | 3.5875 | 345.60 | 0.0161 |
| 28 | 3.6302 | 341.53 | 0.0277 |
| 29 | 3.6438 | 340.26 | 0.0146 |
| 30 | 3.6649 | 338.30 | 0.0080 |
| 31 | 3.6886 | 336.13 | 0.0351 |
| 32 | 3.6920 | 335.82 | 0.0531 |
| 33 | 3.7189 | 333.39 | 0.0177 |
| 34 | 3.7379 | 331.70 | 0.2939 |
| 35 | 3.7775 | 328.22 | 0.2785 |
| 36 | 3.8132 | 325.14 | 0.0554 |
| 37 | 3.8459 | 322.38 | 0.0024 |
| 38 | 3.8845 | 319.17 | 0.0000 |
| 39 | 3.9657 | 312.64 | 0.0013 |
| 40 | 4.0020 | 309.81 | 0.0134 |

#### **RuN3-L5**

|   |        |        |        |
|---|--------|--------|--------|
| 1 | 1.7732 | 699.21 | 0.0520 |
| 2 | 2.0528 | 603.98 | 0.0015 |

|    |        |        |        |
|----|--------|--------|--------|
| 3  | 2.1269 | 582.94 | 0.0514 |
| 4  | 2.2164 | 559.40 | 0.1258 |
| 5  | 2.4107 | 514.31 | 0.0201 |
| 6  | 2.4580 | 504.40 | 0.2543 |
| 7  | 2.6085 | 475.32 | 0.1403 |
| 8  | 2.7228 | 455.35 | 0.0899 |
| 9  | 2.7377 | 452.87 | 0.0142 |
| 10 | 2.7524 | 450.46 | 0.1035 |
| 11 | 2.7851 | 445.16 | 0.0005 |
| 12 | 2.8001 | 442.79 | 0.0002 |
| 13 | 2.9927 | 414.29 | 0.0371 |
| 14 | 3.0231 | 410.12 | 0.0234 |
| 15 | 3.0650 | 404.52 | 0.0014 |
| 16 | 3.0873 | 401.59 | 0.0004 |
| 17 | 3.0947 | 400.63 | 0.0023 |
| 18 | 3.1409 | 394.74 | 0.0000 |
| 19 | 3.1582 | 392.58 | 0.0001 |
| 20 | 3.1909 | 388.55 | 0.0080 |
| 21 | 3.3260 | 372.77 | 0.0262 |
| 22 | 3.3457 | 370.58 | 0.0781 |
| 23 | 3.3634 | 368.62 | 0.0704 |
| 24 | 3.4128 | 363.30 | 0.0151 |
| 25 | 3.4319 | 361.27 | 0.0015 |
| 26 | 3.4540 | 358.95 | 0.0717 |
| 27 | 3.4892 | 355.34 | 0.0157 |
| 28 | 3.4963 | 354.61 | 0.0908 |
| 29 | 3.5390 | 350.33 | 0.0079 |
| 30 | 3.5729 | 347.01 | 0.1021 |
| 31 | 3.6000 | 344.40 | 0.0172 |
| 32 | 3.6563 | 339.10 | 0.0257 |
| 33 | 3.6839 | 336.56 | 0.0148 |
| 34 | 3.7113 | 334.07 | 0.0414 |
| 35 | 3.7357 | 331.89 | 0.0161 |
| 36 | 3.7582 | 329.90 | 0.0000 |
| 37 | 3.7603 | 329.72 | 0.0033 |
| 38 | 3.7782 | 328.16 | 0.0003 |
| 39 | 3.7867 | 327.42 | 0.0261 |
| 40 | 3.7920 | 326.96 | 0.0838 |
| 41 | 3.8450 | 322.46 | 0.0322 |
| 42 | 3.8774 | 319.76 | 0.4476 |
| 43 | 3.9253 | 315.86 | 0.2900 |
| 44 | 3.9705 | 312.26 | 0.1135 |
| 45 | 4.0217 | 308.29 | 0.0237 |
| 46 | 4.0304 | 307.62 | 0.0211 |
| 47 | 4.0798 | 303.89 | 0.0853 |
| 48 | 4.0910 | 303.06 | 0.2166 |
| 49 | 4.1066 | 301.91 | 0.0266 |
| 50 | 4.1590 | 298.11 | 0.1215 |
| 51 | 4.1754 | 296.94 | 0.0357 |
| 52 | 4.2167 | 294.03 | 0.0008 |
| 53 | 4.2307 | 293.06 | 0.0107 |

|    |        |        |        |
|----|--------|--------|--------|
| 54 | 4.2379 | 292.56 | 0.0078 |
| 55 | 4.2739 | 290.09 | 0.0291 |
| 56 | 4.2990 | 288.40 | 0.0006 |
| 57 | 4.3168 | 287.21 | 0.0012 |
| 58 | 4.3224 | 286.84 | 0.0027 |
| 59 | 4.3350 | 286.01 | 0.0517 |
| 60 | 4.3569 | 284.57 | 0.0015 |

**RuN3-L6**

|    |        |        |        |
|----|--------|--------|--------|
| 1  | 1.7828 | 695.46 | 0.0761 |
| 2  | 2.0656 | 600.23 | 0.0031 |
| 3  | 2.1153 | 586.14 | 0.0689 |
| 4  | 2.2078 | 561.57 | 0.1783 |
| 5  | 2.3873 | 519.35 | 0.0666 |
| 6  | 2.4110 | 514.24 | 0.3733 |
| 7  | 2.5812 | 480.34 | 0.2321 |
| 8  | 2.6723 | 463.97 | 0.2145 |
| 9  | 2.6995 | 459.28 | 0.0564 |
| 10 | 2.7112 | 457.30 | 0.0707 |
| 11 | 2.9237 | 424.06 | 0.0003 |
| 12 | 2.9332 | 422.70 | 0.0000 |
| 13 | 2.9768 | 416.51 | 0.0516 |
| 14 | 3.0030 | 412.87 | 0.0831 |
| 15 | 3.0610 | 405.04 | 0.0027 |
| 16 | 3.1032 | 399.53 | 0.0083 |
| 17 | 3.1896 | 388.71 | 0.0360 |
| 18 | 3.1957 | 387.97 | 0.0011 |
| 19 | 3.2130 | 385.88 | 0.0001 |
| 20 | 3.2294 | 383.92 | 0.5839 |
| 21 | 3.2524 | 381.21 | 0.3381 |
| 22 | 3.2742 | 378.67 | 0.0000 |
| 23 | 3.2833 | 377.62 | 0.0001 |
| 24 | 3.2965 | 376.11 | 1.0012 |
| 25 | 3.3470 | 370.44 | 0.1118 |
| 26 | 3.3693 | 367.99 | 0.0577 |
| 27 | 3.4006 | 364.59 | 0.0135 |
| 28 | 3.4172 | 362.82 | 0.0390 |
| 29 | 3.4546 | 358.89 | 0.0462 |
| 30 | 3.4657 | 357.75 | 0.0569 |
| 31 | 3.4794 | 356.34 | 0.0241 |
| 32 | 3.5089 | 353.34 | 0.3649 |
| 33 | 3.5234 | 351.89 | 0.0342 |
| 34 | 3.5305 | 351.18 | 0.1399 |
| 35 | 3.5774 | 346.58 | 0.0305 |
| 36 | 3.6072 | 343.72 | 0.5697 |
| 37 | 3.6176 | 342.72 | 0.0569 |
| 38 | 3.6380 | 340.80 | 0.2554 |
| 39 | 3.6505 | 339.63 | 0.0255 |
| 40 | 3.7058 | 334.57 | 0.0224 |
| 41 | 3.7097 | 334.22 | 0.0216 |
| 42 | 3.7234 | 332.98 | 0.0254 |



|    |        |        |        |
|----|--------|--------|--------|
| 43 | 3.7480 | 330.80 | 0.0181 |
| 44 | 3.7758 | 328.36 | 0.0155 |
| 45 | 3.8002 | 326.26 | 0.0029 |
| 46 | 3.8493 | 322.09 | 0.0528 |
| 47 | 3.8622 | 321.02 | 0.0047 |
| 48 | 3.8930 | 318.48 | 0.0068 |
| 49 | 3.8949 | 318.33 | 0.0001 |
| 50 | 3.9115 | 316.97 | 0.0005 |
| 51 | 3.9556 | 313.44 | 0.0795 |
| 52 | 3.9650 | 312.69 | 0.0070 |
| 53 | 3.9929 | 310.51 | 0.0153 |
| 54 | 4.0178 | 308.59 | 0.0581 |
| 55 | 4.0656 | 304.96 | 0.0191 |
| 56 | 4.0838 | 303.60 | 0.0002 |
| 57 | 4.0839 | 303.59 | 0.0065 |
| 58 | 4.0971 | 302.62 | 0.0018 |
| 59 | 4.1162 | 301.21 | 0.0000 |
| 60 | 4.1251 | 300.56 | 0.0414 |

**RuN3-L7**

|    |        |        |        |
|----|--------|--------|--------|
| 1  | 1.7777 | 697.46 | 0.0787 |
| 2  | 2.0589 | 602.18 | 0.0027 |
| 3  | 2.1130 | 586.77 | 0.0760 |
| 4  | 2.1930 | 565.36 | 0.1754 |
| 5  | 2.3807 | 520.80 | 0.2281 |
| 6  | 2.3950 | 517.68 | 0.2111 |
| 7  | 2.5725 | 481.96 | 0.2654 |
| 8  | 2.6549 | 467.00 | 0.1851 |
| 9  | 2.6802 | 462.60 | 0.0321 |
| 10 | 2.7006 | 459.09 | 0.0604 |
| 11 | 2.9176 | 424.95 | 0.0003 |
| 12 | 2.9273 | 423.54 | 0.0000 |
| 13 | 2.9635 | 418.36 | 0.0671 |
| 14 | 2.9894 | 414.74 | 0.0845 |
| 15 | 3.0508 | 406.40 | 0.0028 |
| 16 | 3.0899 | 401.26 | 0.0164 |
| 17 | 3.1098 | 398.69 | 0.6293 |
| 18 | 3.1763 | 390.34 | 0.0535 |
| 19 | 3.1830 | 389.52 | 0.0012 |
| 20 | 3.2040 | 386.97 | 0.0002 |
| 21 | 3.2381 | 382.89 | 0.1401 |
| 22 | 3.2632 | 379.94 | 0.8751 |
| 23 | 3.2702 | 379.13 | 0.0000 |
| 24 | 3.2771 | 378.34 | 0.0001 |
| 25 | 3.3408 | 371.12 | 0.0407 |
| 26 | 3.3606 | 368.94 | 0.0227 |
| 27 | 3.3884 | 365.91 | 0.0158 |
| 28 | 3.4017 | 364.48 | 0.1109 |
| 29 | 3.4128 | 363.30 | 0.3107 |
| 30 | 3.4305 | 361.42 | 0.0127 |
| 31 | 3.4464 | 359.75 | 0.0017 |

|    |        |        |        |
|----|--------|--------|--------|
| 32 | 3.4712 | 357.18 | 0.0122 |
| 33 | 3.4960 | 354.64 | 0.1083 |
| 34 | 3.5079 | 353.45 | 0.0272 |
| 35 | 3.5264 | 351.59 | 0.0232 |
| 36 | 3.5771 | 346.61 | 0.0069 |
| 37 | 3.5900 | 345.36 | 0.2689 |
| 38 | 3.6170 | 342.79 | 0.0439 |
| 39 | 3.6445 | 340.19 | 0.0143 |
| 40 | 3.6480 | 339.87 | 0.0474 |

**RuN3-L8**

|    |        |        |        |
|----|--------|--------|--------|
| 1  | 1.7424 | 711.56 | 0.0604 |
| 2  | 2.0241 | 612.53 | 0.0023 |
| 3  | 2.1241 | 583.69 | 0.0808 |
| 4  | 2.1692 | 571.56 | 0.0778 |
| 5  | 2.3576 | 525.90 | 0.3573 |
| 6  | 2.4110 | 514.25 | 0.0091 |
| 7  | 2.5556 | 485.15 | 0.2052 |
| 8  | 2.6175 | 473.67 | 0.0649 |
| 9  | 2.6410 | 469.46 | 0.0493 |
| 10 | 2.6899 | 460.92 | 0.0457 |
| 11 | 2.9474 | 420.66 | 0.0414 |
| 12 | 2.9608 | 418.76 | 0.0177 |
| 13 | 3.0383 | 408.07 | 0.0011 |
| 14 | 3.1756 | 390.42 | 0.0088 |
| 15 | 3.3069 | 374.92 | 0.2045 |
| 16 | 3.3126 | 374.28 | 0.0228 |
| 17 | 3.3359 | 371.66 | 0.0226 |
| 18 | 3.3899 | 365.74 | 0.0396 |
| 19 | 3.3943 | 365.27 | 0.0379 |
| 20 | 3.4303 | 361.44 | 0.0431 |
| 21 | 3.4704 | 357.26 | 0.0279 |
| 22 | 3.4963 | 354.61 | 0.1514 |
| 23 | 3.5151 | 352.72 | 0.0223 |
| 24 | 3.5504 | 349.21 | 0.1165 |
| 25 | 3.5923 | 345.14 | 0.0164 |
| 26 | 3.6524 | 339.46 | 0.1464 |
| 27 | 3.6773 | 337.16 | 0.4076 |
| 28 | 3.7085 | 334.32 | 0.0719 |
| 29 | 3.7550 | 330.18 | 0.0482 |
| 30 | 3.7660 | 329.22 | 0.0378 |
| 31 | 3.7753 | 328.41 | 0.1018 |
| 32 | 3.7856 | 327.51 | 0.0219 |
| 33 | 3.7925 | 326.92 | 0.2730 |
| 34 | 3.8105 | 325.38 | 0.0472 |
| 35 | 3.8317 | 323.57 | 0.1427 |
| 36 | 3.8776 | 319.74 | 0.1467 |
| 37 | 3.9396 | 314.71 | 0.0005 |
| 38 | 3.9795 | 311.55 | 0.2766 |
| 39 | 4.0480 | 306.28 | 0.0760 |
| 40 | 4.0856 | 303.46 | 0.0036 |

**RuN3-L9**

|    |        |        |        |
|----|--------|--------|--------|
| 1  | 1.6069 | 771.58 | 0.0834 |
| 2  | 1.8694 | 663.23 | 0.0823 |
| 3  | 1.9015 | 652.04 | 0.0076 |
| 4  | 2.0219 | 613.20 | 0.3841 |
| 5  | 2.1428 | 578.62 | 0.1094 |
| 6  | 2.1748 | 570.10 | 0.1765 |
| 7  | 2.2099 | 561.04 | 0.0106 |
| 8  | 2.3127 | 536.11 | 0.0433 |
| 9  | 2.4268 | 510.90 | 0.0007 |
| 10 | 2.5749 | 481.52 | 0.0680 |
| 11 | 2.6225 | 472.78 | 0.0113 |
| 12 | 2.6501 | 467.85 | 0.0091 |
| 13 | 2.7241 | 455.14 | 0.0344 |
| 14 | 2.8686 | 432.21 | 0.0272 |
| 15 | 2.9407 | 421.62 | 0.0408 |
| 16 | 2.9864 | 415.16 | 0.1590 |
| 17 | 3.0992 | 400.05 | 0.7148 |
| 18 | 3.1604 | 392.31 | 0.3501 |
| 19 | 3.2072 | 386.58 | 0.0173 |
| 20 | 3.2245 | 384.51 | 0.2138 |
| 21 | 3.2450 | 382.07 | 0.0093 |
| 22 | 3.2473 | 381.81 | 0.6177 |
| 23 | 3.2614 | 380.16 | 0.0666 |
| 24 | 3.2961 | 376.15 | 0.0534 |
| 25 | 3.3057 | 375.07 | 0.0022 |
| 26 | 3.3533 | 369.74 | 0.1237 |
| 27 | 3.3598 | 369.03 | 0.1456 |
| 28 | 3.3940 | 365.31 | 0.0394 |
| 29 | 3.4074 | 363.87 | 0.1023 |
| 30 | 3.4498 | 359.39 | 0.0253 |
| 31 | 3.4885 | 355.41 | 0.1995 |
| 32 | 3.5400 | 350.24 | 0.0086 |
| 33 | 3.5923 | 345.14 | 0.0277 |
| 34 | 3.6222 | 342.29 | 0.1967 |
| 35 | 3.6630 | 338.48 | 0.0768 |
| 36 | 3.6696 | 337.87 | 0.1941 |
| 37 | 3.6839 | 336.56 | 0.0420 |
| 38 | 3.7525 | 330.41 | 0.0430 |
| 39 | 3.7683 | 329.02 | 0.0156 |
| 40 | 3.7919 | 326.97 | 0.0080 |

**RuStar-L2**

|   |        |        |        |
|---|--------|--------|--------|
| 1 | 2.4379 | 508.57 | 0.0179 |
| 2 | 2.4386 | 508.43 | 0.0177 |
| 3 | 2.4406 | 508.01 | 0.0175 |
| 4 | 2.5959 | 477.61 | 0.0049 |
| 5 | 2.6256 | 472.20 | 0.1109 |
| 6 | 2.6268 | 471.99 | 0.1099 |
| 7 | 2.7443 | 451.79 | 0.4338 |

|    |        |        |        |
|----|--------|--------|--------|
| 8  | 2.7445 | 451.76 | 0.4336 |
| 9  | 3.0281 | 409.45 | 0.0177 |
| 10 | 3.3423 | 370.95 | 0.0792 |
| 11 | 3.3511 | 369.98 | 0.2540 |
| 12 | 3.3518 | 369.91 | 0.2562 |
| 13 | 3.3934 | 365.36 | 0.0682 |
| 14 | 3.3945 | 365.25 | 0.0690 |
| 15 | 3.5144 | 352.79 | 0.1928 |
| 16 | 3.5176 | 352.46 | 0.0294 |
| 17 | 3.5180 | 352.43 | 0.0350 |
| 18 | 3.5422 | 350.02 | 0.0190 |
| 19 | 3.7006 | 335.04 | 0.0051 |
| 20 | 3.7012 | 334.98 | 0.0051 |
| 21 | 3.7017 | 334.94 | 0.0051 |
| 22 | 3.7659 | 329.23 | 0.0456 |
| 23 | 3.8045 | 325.89 | 0.0025 |
| 24 | 3.8050 | 325.84 | 0.0026 |
| 25 | 3.8052 | 325.82 | 0.0026 |
| 26 | 3.8147 | 325.02 | 0.1545 |
| 27 | 3.8159 | 324.92 | 0.1556 |
| 28 | 3.8588 | 321.30 | 0.2774 |
| 29 | 3.8591 | 321.27 | 0.2821 |
| 30 | 3.8730 | 320.13 | 0.0001 |
| 31 | 3.8740 | 320.04 | 0.0001 |
| 32 | 3.8745 | 320.00 | 0.0001 |
| 33 | 3.9228 | 316.06 | 0.5893 |
| 34 | 3.9409 | 314.61 | 0.2995 |
| 35 | 3.9410 | 314.60 | 0.2959 |
| 36 | 4.0492 | 306.19 | 0.0009 |
| 37 | 4.0666 | 304.88 | 0.0172 |
| 38 | 4.0670 | 304.85 | 0.0171 |
| 39 | 4.1047 | 302.05 | 0.0587 |
| 40 | 4.1051 | 302.03 | 0.0593 |

#### **RuStar-L5**

|    |        |        |        |
|----|--------|--------|--------|
| 1  | 2.3652 | 524.21 | 0.0615 |
| 2  | 2.3745 | 522.15 | 0.0054 |
| 3  | 2.3758 | 521.86 | 0.0052 |
| 4  | 2.5051 | 494.93 | 0.0214 |
| 5  | 2.5247 | 491.09 | 0.1483 |
| 6  | 2.5251 | 491.00 | 0.1444 |
| 7  | 2.6463 | 468.52 | 0.5514 |
| 8  | 2.6469 | 468.41 | 0.5599 |
| 9  | 2.8923 | 428.67 | 0.0000 |
| 10 | 3.1557 | 392.89 | 0.2841 |
| 11 | 3.1560 | 392.85 | 0.2865 |
| 12 | 3.2515 | 381.31 | 0.3956 |
| 13 | 3.2525 | 381.19 | 0.1977 |
| 14 | 3.2533 | 381.11 | 0.2076 |
| 15 | 3.2653 | 379.70 | 0.6281 |
| 16 | 3.2749 | 378.59 | 0.0407 |

|    |        |        |        |
|----|--------|--------|--------|
| 17 | 3.2752 | 378.55 | 0.0425 |
| 18 | 3.3156 | 373.94 | 0.0895 |
| 19 | 3.4438 | 360.02 | 0.0105 |
| 20 | 3.4451 | 359.89 | 0.0104 |
| 21 | 3.5274 | 351.49 | 0.0000 |
| 22 | 3.5777 | 346.55 | 0.0510 |
| 23 | 3.5777 | 346.54 | 0.0510 |
| 24 | 3.6841 | 336.54 | 0.4279 |
| 25 | 3.6849 | 336.46 | 0.4300 |
| 26 | 3.7091 | 334.27 | 0.0981 |
| 27 | 3.7093 | 334.25 | 0.0966 |
| 28 | 3.7175 | 333.51 | 0.0228 |
| 29 | 3.7311 | 332.30 | 0.0001 |
| 30 | 3.7489 | 330.72 | 0.1828 |
| 31 | 3.7496 | 330.66 | 0.0094 |
| 32 | 3.7499 | 330.63 | 0.0215 |
| 33 | 3.7503 | 330.60 | 0.0260 |
| 34 | 3.7505 | 330.58 | 0.0082 |
| 35 | 3.7508 | 330.55 | 0.0357 |
| 36 | 3.7522 | 330.43 | 0.7198 |
| 37 | 3.8345 | 323.34 | 0.0022 |
| 38 | 3.8356 | 323.25 | 0.0024 |
| 39 | 3.8357 | 323.24 | 0.0024 |
| 40 | 3.8360 | 323.22 | 0.0018 |

**RuStar-L6**

|    |        |        |        |
|----|--------|--------|--------|
| 1  | 2.3225 | 533.85 | 0.1621 |
| 2  | 2.3412 | 529.58 | 0.0095 |
| 3  | 2.3422 | 529.34 | 0.0095 |
| 4  | 2.4417 | 507.78 | 0.4824 |
| 5  | 2.4420 | 507.72 | 0.4823 |
| 6  | 2.4480 | 506.47 | 0.0623 |
| 7  | 2.5558 | 485.12 | 0.9568 |
| 8  | 2.5558 | 485.10 | 0.9815 |
| 9  | 2.8055 | 441.94 | 0.0000 |
| 10 | 3.0106 | 411.83 | 0.2463 |
| 11 | 3.0109 | 411.78 | 0.2170 |
| 12 | 3.0260 | 409.73 | 2.4105 |
| 13 | 3.0282 | 409.43 | 1.8549 |
| 14 | 3.0287 | 409.36 | 1.8622 |
| 15 | 3.1217 | 397.17 | 0.0505 |
| 16 | 3.1220 | 397.13 | 0.1363 |
| 17 | 3.1227 | 397.04 | 0.0867 |
| 18 | 3.1255 | 396.68 | 0.0666 |
| 19 | 3.1258 | 396.65 | 0.0473 |
| 20 | 3.1602 | 392.33 | 0.0001 |
| 21 | 3.1794 | 389.96 | 0.1300 |
| 22 | 3.2504 | 381.45 | 0.1434 |
| 23 | 3.2512 | 381.35 | 0.1617 |
| 24 | 3.2532 | 381.11 | 0.0069 |
| 25 | 3.2957 | 376.20 | 0.0568 |

|    |        |        |        |
|----|--------|--------|--------|
| 26 | 3.3146 | 374.05 | 0.2140 |
| 27 | 3.3153 | 373.98 | 0.2003 |
| 28 | 3.3184 | 373.63 | 0.0020 |
| 29 | 3.3245 | 372.94 | 0.1574 |
| 30 | 3.3248 | 372.91 | 0.1900 |
| 31 | 3.3456 | 370.58 | 0.0001 |
| 32 | 3.3638 | 368.58 | 0.0235 |
| 33 | 3.3640 | 368.56 | 0.0228 |
| 34 | 3.3874 | 366.02 | 0.0213 |
| 35 | 3.3881 | 365.94 | 0.0226 |
| 36 | 3.4726 | 357.04 | 0.0454 |
| 37 | 3.4749 | 356.80 | 0.2432 |
| 38 | 3.4749 | 356.80 | 0.2237 |
| 39 | 3.4859 | 355.67 | 0.0356 |
| 40 | 3.4861 | 355.65 | 0.0378 |

**RuStar-L8**

|    |        |        |        |
|----|--------|--------|--------|
| 1  | 2.3395 | 529.96 | 0.0796 |
| 2  | 2.3506 | 527.46 | 0.0066 |
| 3  | 2.3511 | 527.35 | 0.0065 |
| 4  | 2.4756 | 500.82 | 0.0282 |
| 5  | 2.4908 | 497.76 | 0.1983 |
| 6  | 2.4912 | 497.69 | 0.1917 |
| 7  | 2.6078 | 475.44 | 0.6375 |
| 8  | 2.6081 | 475.39 | 0.6488 |
| 9  | 2.8412 | 436.38 | 0.0000 |
| 10 | 3.0555 | 405.78 | 0.3478 |
| 11 | 3.0562 | 405.68 | 0.3509 |
| 12 | 3.1408 | 394.75 | 0.4194 |
| 13 | 3.1419 | 394.62 | 0.4120 |
| 14 | 3.1474 | 393.92 | 0.7935 |
| 15 | 3.1539 | 393.11 | 0.0002 |
| 16 | 3.1695 | 391.18 | 0.0945 |
| 17 | 3.1697 | 391.15 | 0.0919 |
| 18 | 3.2858 | 377.33 | 0.0885 |
| 19 | 3.4074 | 363.87 | 0.0102 |
| 20 | 3.4085 | 363.75 | 0.0105 |
| 21 | 3.4429 | 360.12 | 0.0000 |
| 22 | 3.5182 | 352.41 | 0.1617 |
| 23 | 3.5190 | 352.33 | 0.1673 |
| 24 | 3.5382 | 350.41 | 0.3877 |
| 25 | 3.5391 | 350.33 | 0.4041 |
| 26 | 3.6049 | 343.93 | 0.9796 |
| 27 | 3.6223 | 342.28 | 0.0001 |
| 28 | 3.6418 | 340.45 | 0.0618 |
| 29 | 3.6420 | 340.43 | 0.0601 |
| 30 | 3.6561 | 339.12 | 0.0280 |
| 31 | 3.7111 | 334.09 | 0.2427 |
| 32 | 3.7113 | 334.07 | 0.2513 |
| 33 | 3.7134 | 333.88 | 0.0052 |
| 34 | 3.7908 | 327.06 | 0.0009 |

|    |        |        |        |
|----|--------|--------|--------|
| 35 | 3.8031 | 326.01 | 0.3792 |
| 36 | 3.8033 | 325.99 | 0.3795 |
| 37 | 3.8199 | 324.58 | 0.0001 |
| 38 | 3.8492 | 322.10 | 0.0002 |
| 39 | 3.8498 | 322.05 | 0.0002 |
| 40 | 3.9057 | 317.44 | 0.0512 |

**RuStar-L9**

|    |        |        |        |
|----|--------|--------|--------|
| 1  | 2.2763 | 544.69 | 0.1323 |
| 2  | 2.2892 | 541.62 | 0.0129 |
| 3  | 2.2897 | 541.48 | 0.0093 |
| 4  | 2.4047 | 515.59 | 0.1158 |
| 5  | 2.4090 | 514.67 | 0.3686 |
| 6  | 2.4104 | 514.38 | 0.4488 |
| 7  | 2.5085 | 494.25 | 0.8598 |
| 8  | 2.5089 | 494.17 | 0.9790 |
| 9  | 2.6805 | 462.55 | 0.0002 |
| 10 | 2.7580 | 449.55 | 0.4057 |
| 11 | 2.7604 | 449.16 | 0.4385 |
| 12 | 2.8099 | 441.25 | 0.7112 |
| 13 | 2.8112 | 441.03 | 0.4325 |
| 14 | 2.8113 | 441.02 | 0.4535 |
| 15 | 2.8565 | 434.04 | 0.0075 |
| 16 | 2.8639 | 432.92 | 0.1007 |
| 17 | 2.8661 | 432.58 | 0.1248 |
| 18 | 3.0538 | 406.00 | 0.0029 |
| 19 | 3.1110 | 398.53 | 0.1615 |
| 20 | 3.1620 | 392.11 | 0.1304 |
| 21 | 3.1633 | 391.94 | 0.1010 |
| 22 | 3.2225 | 384.74 | 0.0007 |
| 23 | 3.2240 | 384.57 | 0.0005 |
| 24 | 3.2458 | 381.98 | 0.4612 |
| 25 | 3.2476 | 381.78 | 0.5807 |
| 26 | 3.2751 | 378.57 | 0.3342 |
| 27 | 3.2884 | 377.03 | 0.0281 |
| 28 | 3.2894 | 376.93 | 0.0149 |
| 29 | 3.3055 | 375.09 | 0.5499 |
| 30 | 3.3265 | 372.71 | 0.0006 |
| 31 | 3.3804 | 366.77 | 0.0889 |
| 32 | 3.3849 | 366.28 | 1.0009 |
| 33 | 3.3873 | 366.03 | 1.1756 |
| 34 | 3.4664 | 357.67 | 0.5322 |
| 35 | 3.4705 | 357.25 | 0.6064 |
| 36 | 3.4789 | 356.38 | 0.0105 |
| 37 | 3.4908 | 355.17 | 0.0031 |
| 38 | 3.5350 | 350.74 | 0.1561 |
| 39 | 3.5375 | 350.48 | 0.1730 |
| 40 | 3.5525 | 349.01 | 0.0915 |

---

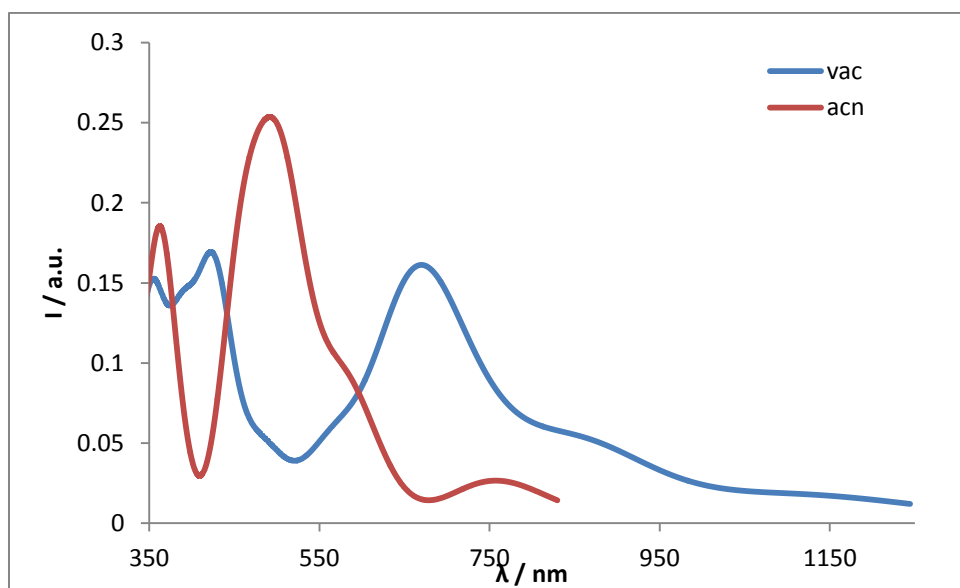

**Figure S1.** Calculated absorption spectra for RuN3-L1 with PBE0/SDD in vacuum (blue) and in acetonitrile (red).

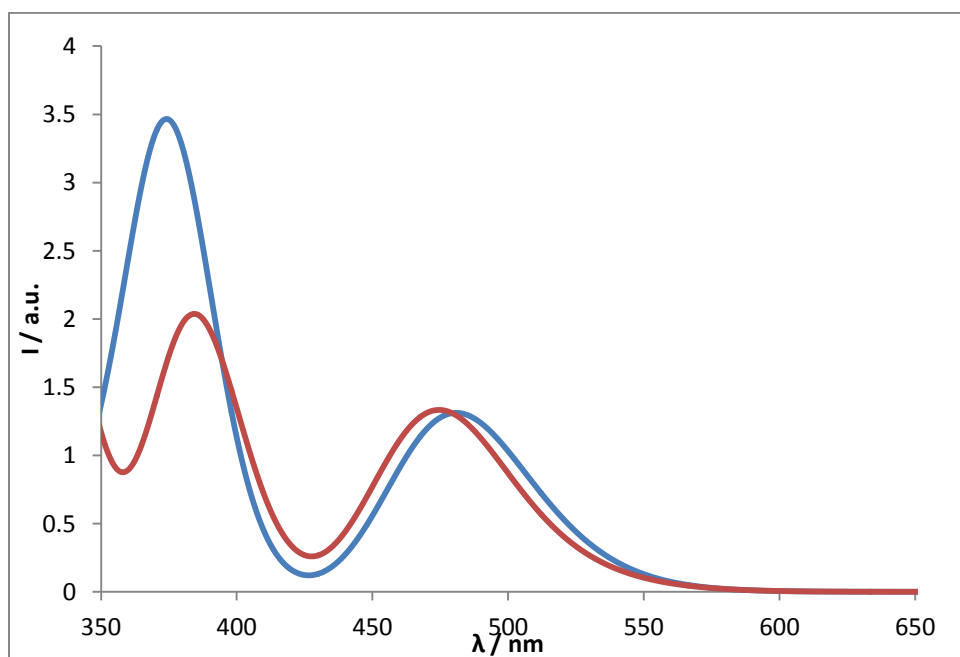

**Figure S2.** Calculated absorption spectra for RuStar-L5 with PBE0/SDD in vacuum (blue) and in acetonitrile (red).



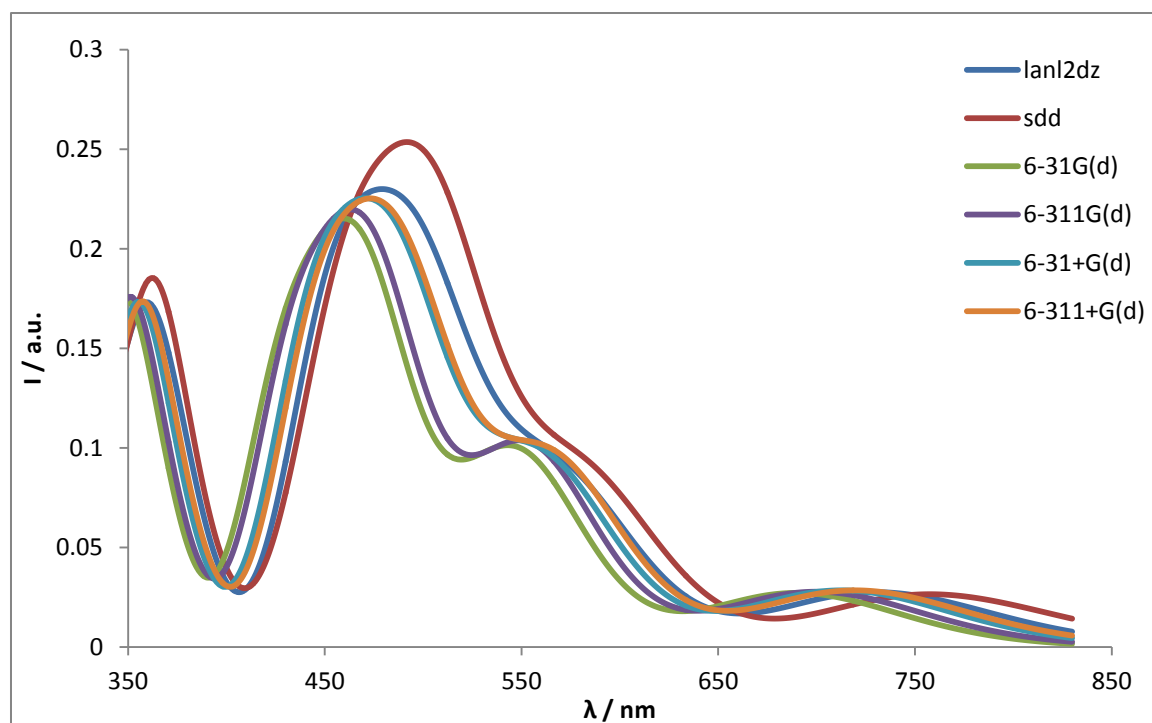

**Figure S3.** Calculated absorption spectra for RuN3-L1 with PBE0 in acetonitrile using different basis sets.

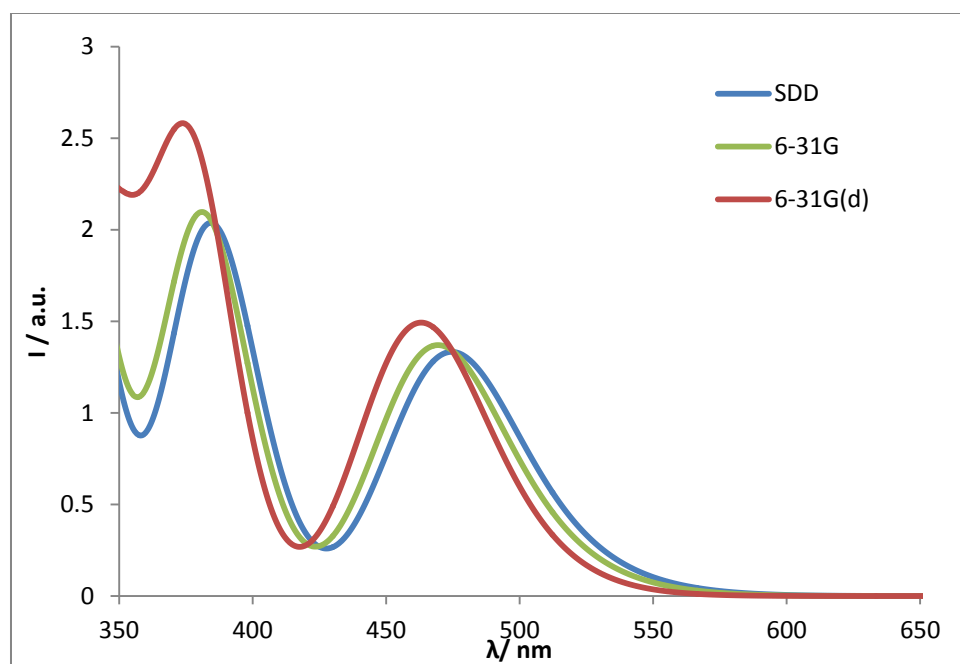

**Figure S4.** Calculated absorption spectra for RuStar-L5 with PBE0 in acetonitrile using different basis sets.
